# Supplementary material for: Mutual interaction between visual homeostatic plasticity and sleep in adult humans
Source: eLife. 2022 Aug 16;11:e70633. doi: 10.7554/eLife.70633 (PMC9417418; doi:10.7554/eLife.70633)
Supplement: Figure 1—source data 1. [file elife-70633-fig1-data1.xlsx]

## Sheet: Foglio1
	S1	S2	S3	S4	S5	S6	S7	S8	S9	S10	S1	S12	S13	S14	S15	S16	S17	S18	S19		MEAN	SEM
	CONTROL NIGHT
before	1.25583	0.98771	1.0742	1.02969	1.07917	0.99251	0.96785	1.0662	1.01026	1.23017	0.98887	1.20967	1.23223	1.10326	1.10551	1.0688	1.15049	NaN	0.81651		1.07605	0.02642
after	0.89568	0.87128	1.03274	0.92519	0.78517	0.93463	0.90761	1.39571	0.89501	0.82062	1.03503	1.16078	1.61359	1.14314	1.07525	1.58085	1.32827	NaN	0.95379		1.07524	0.05908
4	0.88271	1.26285	1.01037	0.92693	0.79845	1.16805	0.89296	1.12602	1.16103	1.03801	1.29214	1.33983	1.21722	1.15303	1.07757	1.35431	1.23171	NaN	0.80702		1.09668	0.04191
14	1.04253	1.1189	1.02247	1.15795	0.79834	0.92301	1.01657	1.34052	1.00646	0.95648	0.81824	0.99835	0.88637	1.1892	0.94741	1.40324	1.22649	NaN	0.55588		1.02269	0.04757
30	1.18213	0.75834	1.11887	1.02484	0.79822	1.0195	1.0739	1.21635	1.26947	0.8272	1.05174	1.1354	0.84434	1.1892	0.97578	1.13512	1.27129	NaN	0.72445		1.03423	0.04164
	MONOCULAR DEPRIVATION NIGHT
before	0.73704	0.8608	0.47437	0.96123	0.59798	0.92642	0.5493	0.49903	0.64299	0.85164	0.78025	0.73497	0.72362	0.74362	0.90289	0.75533	1.13025	0.69251	1.0078		0.76695	0.03997
after	0.9251	0.88743	1.0194	0.85817	0.81156	0.51765	0.78497	0.67601	0.65981	0.86814	1.18516	0.96874	0.83512	0.88671	1.24802	0.7456	0.80123	0.83596	0.93511		0.86579	0.03904
4	1.08226	0.87926	1.05491	1.06387	1.14891	0.9702	0.91334	0.69745	0.81892	1.03404	1.0614	0.88877	0.83074	0.91802	0.96676	0.93156	0.62853	0.87029	0.61215		0.91428	0.03452
14	0.92594	0.80283	1.08722	1.21106	1.10129	1.04725	0.88872	0.69659	0.92841	1.03483	1.11649	1.22184	0.80379	1.13707	1.28956	0.83615	0.60601	1.14043	0.88529		0.98741	0.04311
30	1.05086	0.91877	1.32334	1.04937	1.32075	0.94638	0.88889	0.89004	0.90623	0.77864	1.35445	1.0749	0.78228	0.87231	1.11396	0.75321	0.58911	1.06335	1.15998		0.99141	0.04745
