# Supplementary material for: Mutual interaction between visual homeostatic plasticity and sleep in adult humans
Source: eLife. 2022 Aug 16;11:e70633. doi: 10.7554/eLife.70633 (PMC9417418; doi:10.7554/eLife.70633)
Supplement: Figure 2—figure supplement 1—source data 1. [file elife-70633-fig2-figsupp1-data1.xlsx]

## Sheet: Foglio1
	S1	S2	S3	S4	S5	S6	S7	S8	S9		MEAN	SEM
	MONOCULAR DEPRIVATION MORNING
4	0.61742	0.95488	0.75632	1.04813	0.87849	0.60784	0.68204	0.20381	0.85854		0.73416	0.08314
14	0.7598	0.87109	0.88052	0.85436	0.85885	0.73698	0.86797	0.46737	0.8235		0.79116	0.04388
39	0.7959	0.9593	0.93836	1.02803	0.89581	0.72171	0.91836	0.51911	0.93031		0.85632	0.0518
76	0.86864	1.00107	0.93961	1.21964	0.89892	0.84239	0.96878	0.58097	0.932		0.91689	0.05568
120	0.75391	1.03132	1.08576	1.03176	0.9215	0.78098	0.97935	0.95362	0.76896		0.92302	0.04194
	MONOCULAR DEPRIVATION EVENING
4	0.69465	0.83421	0.92771	1.10975	0.98137	0.63737	0.79916	0.64058	1.01939		0.84935	0.05719
14	0.74748	0.83729	0.9079	1.03392	1.00683	0.78766	0.94493	0.71269	0.98389		0.88473	0.03931
39	0.78434	0.98205	1.07709	1.11565	1.01796	0.8146	0.91417	0.71092	0.94303		0.92887	0.04557
76	0.84937	1.02011	0.96121	1.11913	1.06093	0.89489	0.75739	0.82028	1.02175		0.94501	0.04048
120	0.99171	1.05861	1.15855	0.99865	1.0524	0.8045	1.22331	0.78499	0.91642		0.99879	0.04897
