# Supplementary material for: Mutual interaction between visual homeostatic plasticity and sleep in adult humans
Source: eLife. 2022 Aug 16;11:e70633. doi: 10.7554/eLife.70633 (PMC9417418; doi:10.7554/eLife.70633)
Supplement: Figure 2—source data 1. [file elife-70633-fig2-data1.xlsx]

## Sheet: Foglio1
	S1	S2	S3	S4	S5	S6	S7	S8	S9	S10	S1	S12	S13	S14	S15	S16	S17		MEAN	SEM
	MONOCULAR DEPRIVATION MORNING
before	0.75277	0.63436	0.29326	0.50764	0.7687	0.47666	0.65095	0.88482	0.68216	0.84043	0.66813	0.77285	0.81625	0.49282	0.87132	1.26497	0.73073		0.71228	0.05182
after	0.80865	0.9023	0.88832	1.12296	2.0023	1.17951	0.9842	0.77401	0.98405	0.99255	0.80712	0.80741	1.08799	0.74702	0.97928	1.46545	0.9882		1.03067	0.0745
	MONOCULAR DEPRIVATION NIGHT
before	0.73704	0.8608	0.47437	0.96123	0.59798	0.92642	0.5493	0.49903	0.64299	0.85164	0.78025	0.73497	0.72362	0.74362	0.90289	0.75533	1.13025		0.75716	0.04207
after	0.9251	0.88743	1.0194	0.85817	0.81156	0.51765	0.78497	0.67601	0.65981	0.86814	1.18516	0.96874	0.83512	0.88671	1.24802	0.7456	0.80123		0.86346	0.04353
